# Supplementary material
Source: publisher site journal article supplement (https://www.dovepress.com/article/490041)
Supplement: Supplementary file 1 [file 490041%20Revised%20Supplementary%20Materials.docx]

Supplementary Box 1 The 27 Cuproptosis genes.

| MTF1 |
| --- |
| GLS |
| CDKN2A |
| FDX1 |
| LIAS |
| LIPT1 |
| DLD |
| DLAT |
| PDHA1 |
| PDHB |
| SLC31A1 |
| DNA2 |
| NTHL1 |
| POLE |
| POLD1 |
| CISD1 |
| GLRX5 |
| PPAT |
| RTEL1 |
| ELP3 |
| CDK5RAP1 |
| ISCA2 |
| ETFDH |
| HSPA1A |
| HSPA1B |
| ATP7A |
| ATP7B |


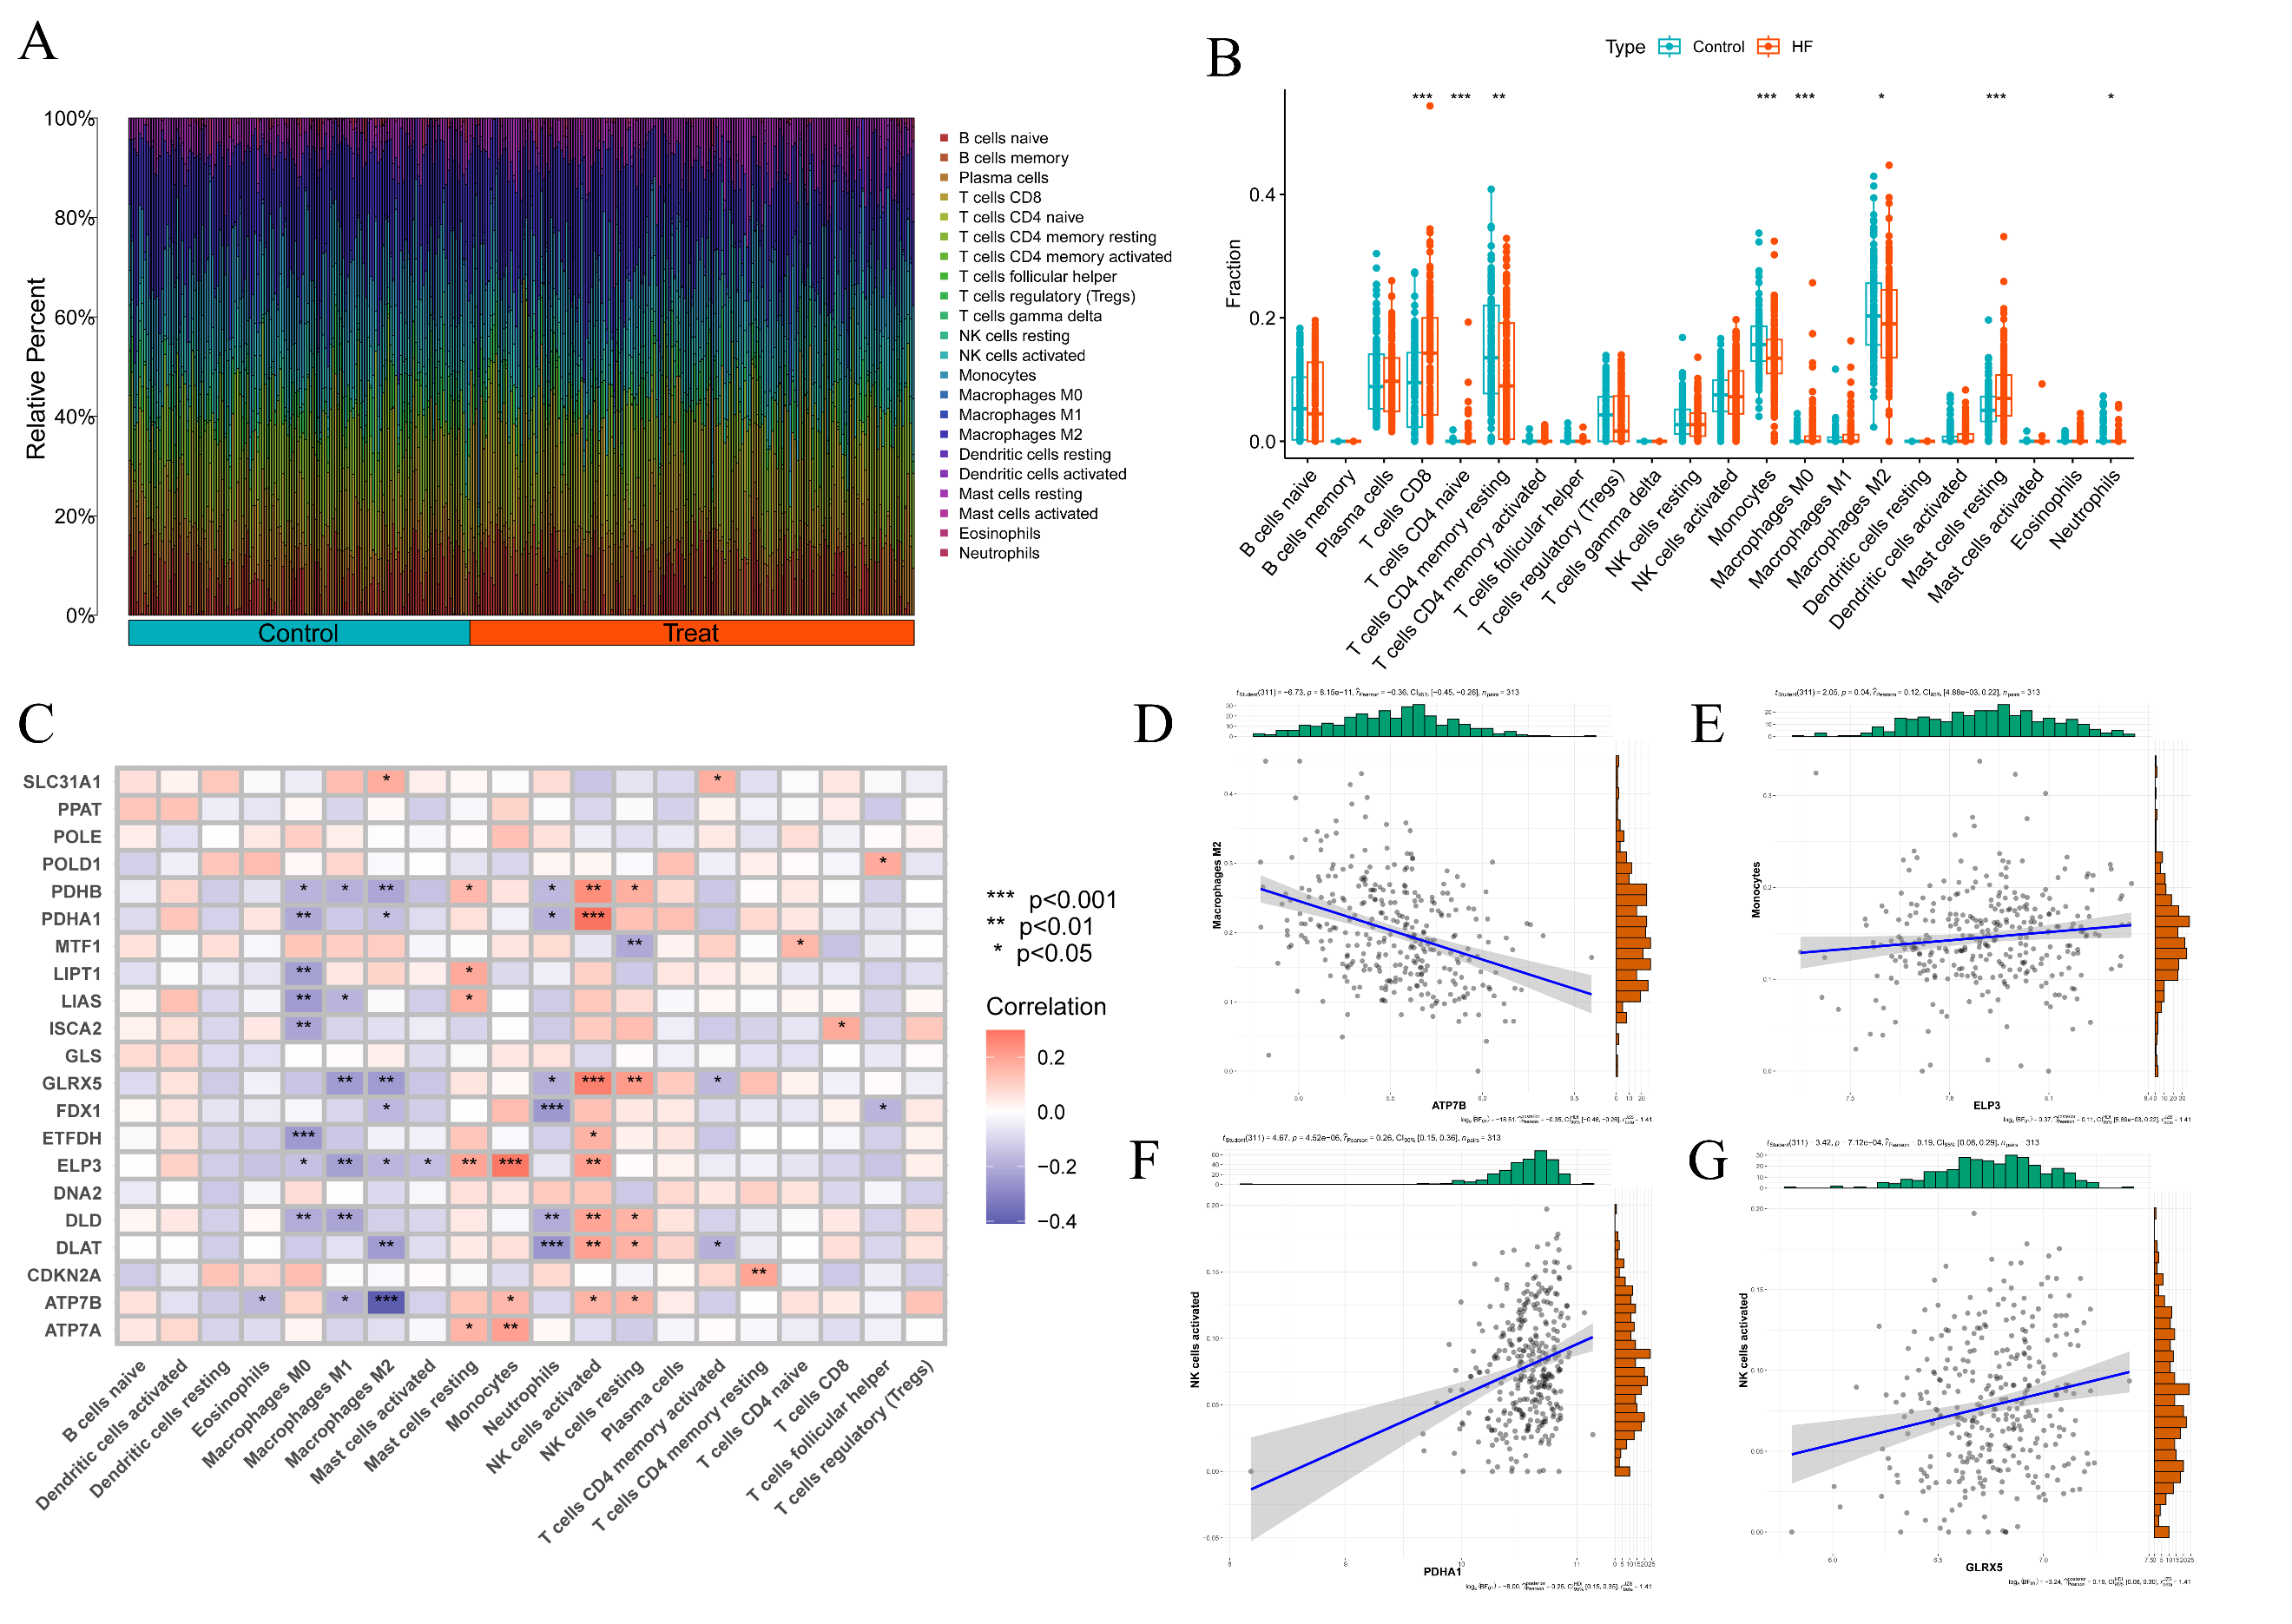


Figure S1 Immune filtration landscape in HF.

(A) Barplot showing percent of immune cells in each sample.

(B) Box plot showing the differences of infiltrated immune cells in Control and HF individuals.

(C) Heatmap showing the correlation between differentially expressed CRGs and immune cells.

(D) The expression correlation between ATP7B and Macrophages M2

(E) The expression correlation between ELP3 and Monocytes.

(F) The expression correlation between PDHA1 and NK cells activated.

(G) The expression correlation between GLRX5 and NK cells activated.

(* p < 0.05, **p < 0.01, ***p < 0.001).


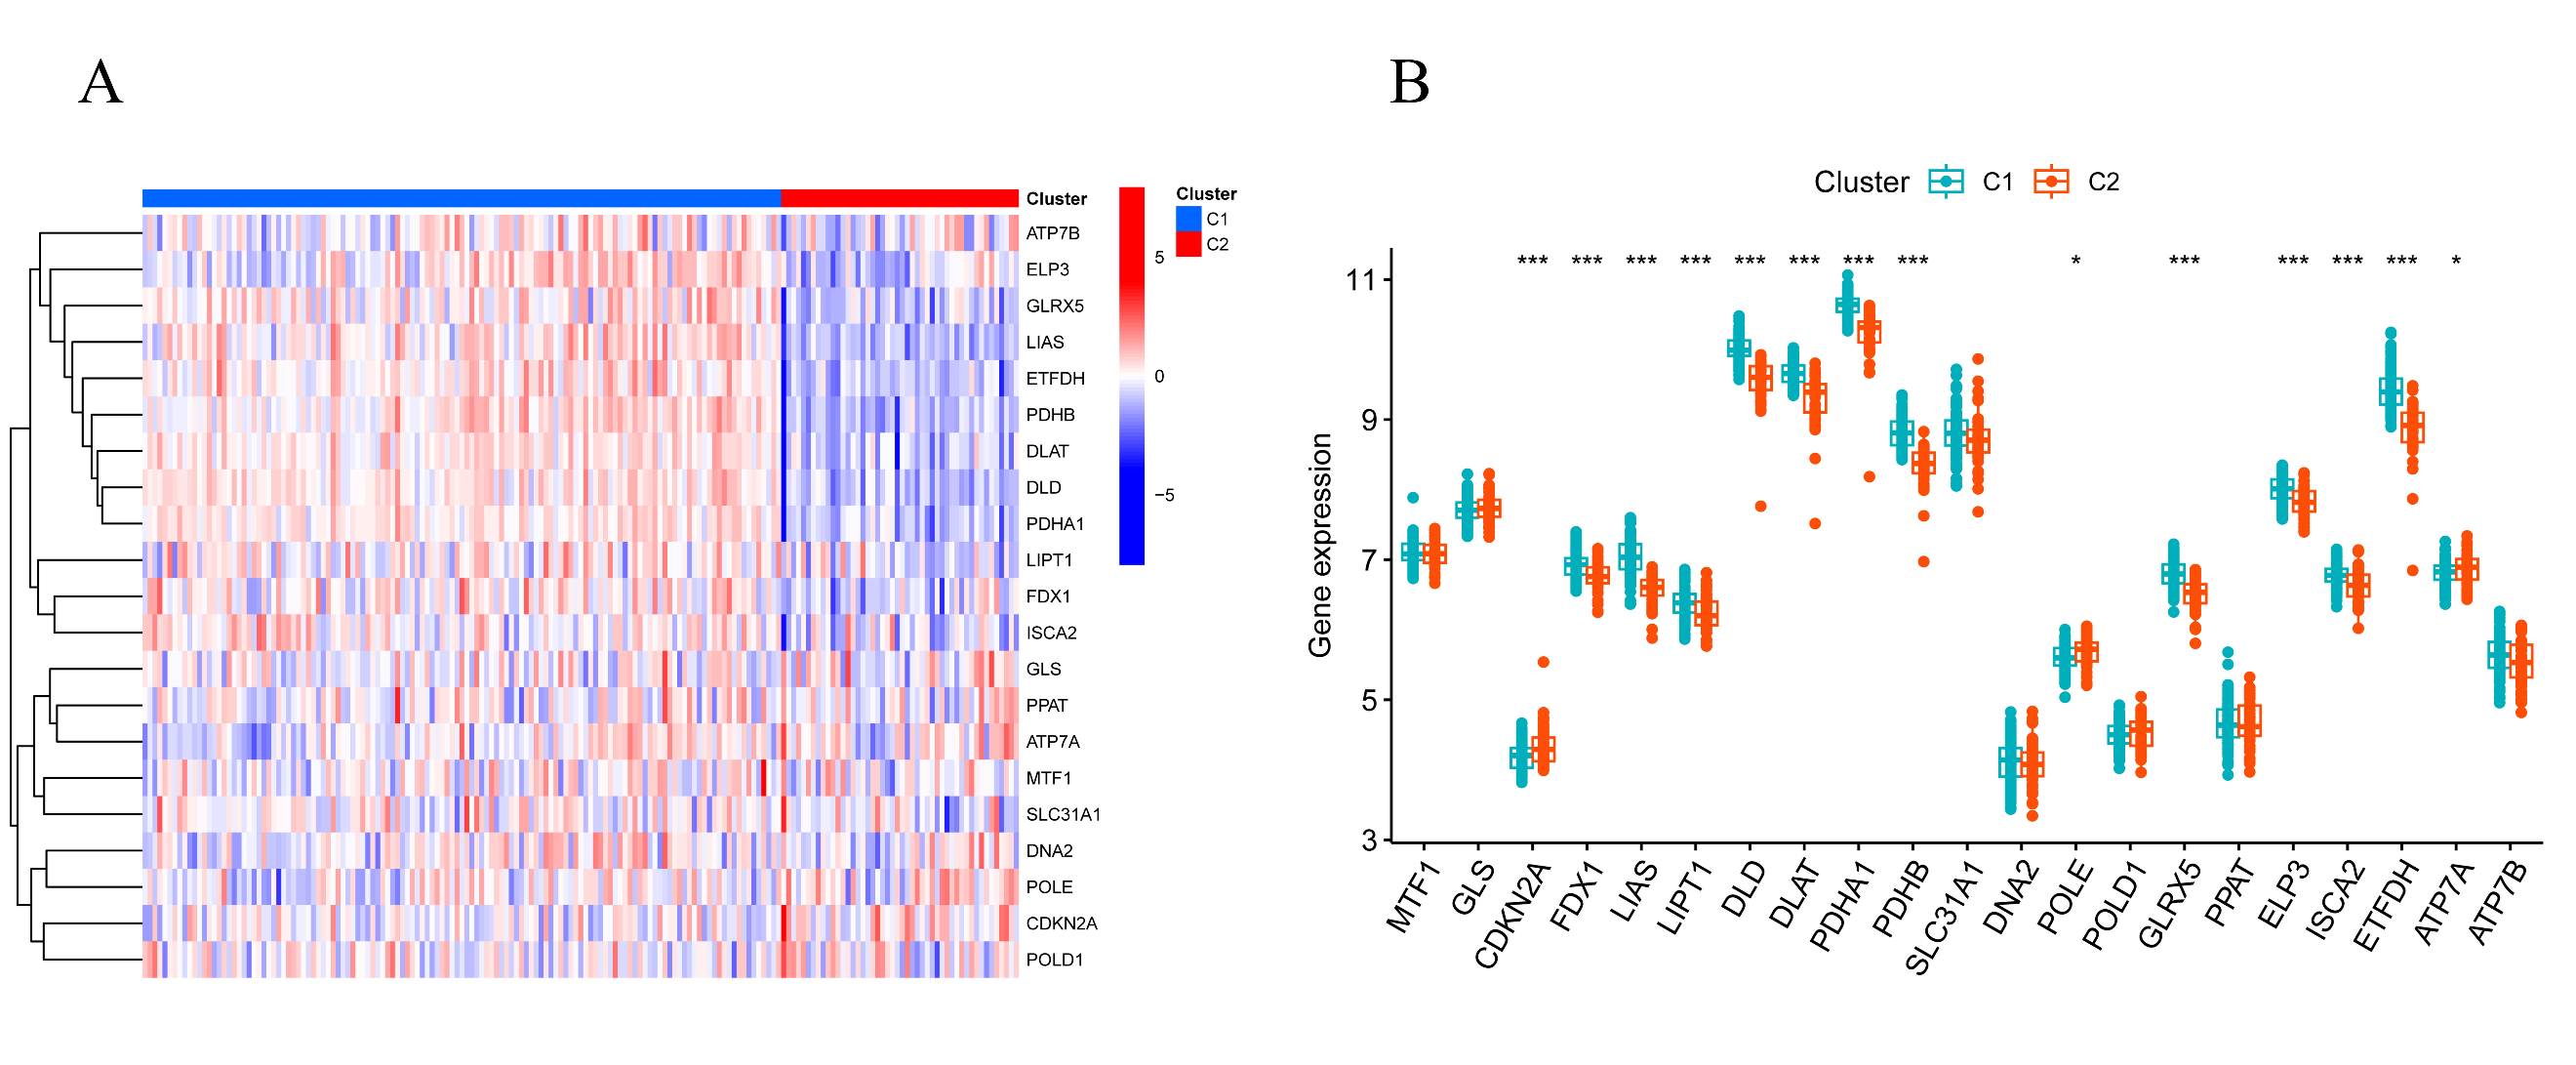


Figure S2 Differential analysis of CRGs between Cuproptosis subtypes

(A) Heatmap showing the expression level of differentially expressed CRGs in subtype 1 and subtype 2 samples.

(B) Boxplot showing the differentially expressed CRGs in subtype 1 and subtype 2 samples. * p < 0.05, *** p < 0.001.

Supplementary Box 2 Genes in blue module.

| SMPD4 |
| --- |
| ACE |
| FLII |
| SUN2 |
| PARD3B |
| COL24A1 |
| FAM96B |
| EMC3 |
| AGRN |
| FOXK2 |
| ADAM22 |
| TMEM53 |
| PSME4 |
| EGLN1 |
| INTU |
| IPCEF1 |
| DZIP1 |
| TMUB1 |
| HEXA |
| ITPK1 |
| GLRX2 |
| SPPL2A |
| CCDC85C |
| RHNO1 |
| KIAA1755 |
| GTF3A |
| KPNA5 |
| MYLIP |
| MAGED2 |
| KLC2 |
| ATG4D |
| CALCOCO2 |
| THOC5 |
| MN1 |
| GABPB2 |
| TEX9 |
| SYT17 |
| LTBP1 |
| RANGAP1 |
| RAD51B |
| TTC8 |
| TPST2 |
| STON2 |
| CCDC125 |
| FAM222A |
| RASL10B |
| LTBP3 |
| DESI1 |
| MTSS1L |
| PIWIL4 |
| LOC100130691 |
| ESRRA |
| COA6 |
| MPV17L2 |
| SDC2 |
| PRRT2 |
| C19orf47 |
| C6orf106 |
| ZC2HC1A |
| PLXNB1 |
| DEXI |
| ZC3H12B |
| EVC |
| DNM3 |
| ENTPD6 |
| RPS6KA2 |
| RBM43 |
| LRP4 |
| GUCD1 |
| SSR3 |
| TINAGL1 |
| SLC27A4 |
| JMJD6 |
| IRX4 |
| ST3GAL1 |
| ZDHHC16 |
| SNCAIP |
| NHLRC3 |
| NACC1 |
| GATA2 |
| TEAD2 |
| ARHGEF28 |
| MDK |
| PRDX6 |
| FAM78B |
| PREX2 |
| IL34 |
| BID |
| NECTIN1 |
| EFHC1 |
| GSDMB |
| CFAP77 |
| MARCKS |
| BACH2 |
| CCDC171 |
| FKBP4 |
| TMX4 |
| RGS11 |
| HS6ST1 |
| BICD1 |
| EPB41L2 |
| PLCD3 |
| HHAT |
| TMEM135 |
| TMEM30B |
| SGCE |
| NF2 |
| ZNF83 |
| FAM13A |
| RANBP6 |
| KLF3-AS1 |
| MIR99AHG |
| PLBD1 |
| CSAD |
| SNTB1 |
| ARHGAP1 |
| LRRK2 |
| TUBB4B |
| MRPS12 |
| TMEM14A |
| TMEM254 |
| EIF4EBP1 |
| CCNQ |
| SLFN13 |
| COPZ2 |
| CPQ |
| FAM102A |
| PARVB |
| NAAA |
| AP3M2 |
| TIMP2 |
| SPATA18 |
| PITPNM1 |
| PCSK5 |
| RBPMS2 |
| ADGRF5 |
| ICK |
| NAALADL2 |
| LRRCC1 |
| IMPA2 |
| CPED1 |
| SLC38A6 |
| SYTL2 |
| SLC29A2 |
| CDC42EP4 |
| RAB23 |
| KCNJ11 |
| FBXL2 |
| KCNS3 |
| PARP8 |
| LIN7A |
| GTF2IRD1 |
| CCNG2 |
| AMD1 |
| LIMA1 |
| MARK3 |
| SSPN |
| KIAA1549 |
| FCER1A |
| SULT1C4 |
| FAM212B |
| PTPRU |
| STARD7 |
| ADAMTSL3 |
| ATP8B1 |
| CCND1 |
| PRDM5 |
| ZNF622 |
| UBA7 |
| NSDHL |
| STARD10 |
| AFF3 |
| ADGRA2 |
| BCL9L |
| TRANK1 |
| AMOT |
| BTN3A3 |
| KCNH2 |
| TET1 |
| DDX58 |
| ANXA4 |
| MTURN |
| ZNF682 |
| PENK |
| RHOF |
| APBB3 |
| AZIN2 |
| STK38L |
| HERC5 |
| 11-Sep |
| BDH2 |
| TENM3 |
| LRRC1 |
| CEP126 |
| ATP1A1 |
| MMP16 |
| HTRA1 |
| MXRA8 |
| SLC39A14 |
| RANBP17 |
| KCND3 |
| ARHGAP28 |
| AK5 |
| CASP1 |
| FURIN |
| CC2D2A |
| FAM107A |
| ANKRD36 |
| EXT1 |
| SEZ6L |
| PHYHD1 |
| CDH6 |
| ANKRD36C |
| SCARA3 |
| HMOX2 |
| DDX60 |
| CDH23 |
| TLR3 |
| COLGALT2 |
| USP31 |
| ALDH1A2 |
| KCNJ8 |
| MYO10 |
| IL17RB |
| LAMA4 |
| LTBP4 |
| BMP4 |
| TMTC1 |
| RHOD |
| ADAMTSL1 |
| PLA2R1 |
| MEOX2 |
| MEIS1 |
| ANO1 |
| AASS |
| XAF1 |
| CENPV |
| LCN10 |
| OAS3 |
| C1QTNF2 |
| LPAR4 |
| PCOLCE2 |
| COL8A1 |
| PLXNC1 |
| STAT3 |
| LAD1 |
| C1QTNF7 |
| CYP27A1 |
| BMP6 |
| FAM102B |
| BOC |
| PCNT |
| CHAC2 |
| CPE |
| BICC1 |
| IFIT3 |
| GPR174 |
| RTL3 |
| OAS2 |
| ATP6V1C2 |
| MEG3 |
| TRIL |
| IGFBP5 |
| CXCL12 |
| LPCAT3 |
| NAMPT |
| MYOF |
| BTN3A2 |
| F8 |
| PLXDC1 |
| MYH10 |
| ZMAT1 |
| COL15A1 |
| IFI44 |
| P2RY2 |
| BTN3A1 |
| CPAMD8 |
| DUSP13 |
| ANTXR1 |
| KCNN3 |
| EPHA3 |
| SEMA4B |
| TRIM22 |
| SLC40A1 |
| ANKRD29 |
| MX2 |
| FOXP2 |
| GRB14 |
| MX1 |
| HIF3A |
| CD74 |
| FRMD4B |
| IFIT2 |
| ST6GALNAC3 |
| SAMD9L |
| COQ8A |
| ASPA |
| TTLL7 |
| JPH1 |
| ADGRD1 |
| PVR |
| OAS1 |
| JAML |
| NTM |
| PRDM1 |
| GNA14 |
| MIRLET7A2 |
| DPYSL3 |
| SLC22A5 |
| XG |
| HLA-DPB1 |
| CREB5 |
| C2orf40 |
| CX3CR1 |
| KIT |
| SLC2A1 |
| LIPH |
| PIK3IP1 |
| C15orf59 |
| ANOS1 |
| ARRDC3 |
| C16orf89 |
| IFI6 |
| SESN3 |
| HMCN1 |
| GNMT |
| ACKR4 |
| ITIH5 |
| MPP3 |
| FGF14 |
| COL12A1 |
| ISLR |
| CSDC2 |
| ABCG2 |
| SLC6A1 |
| NT5E |
| CRHBP |
| HOPX |
| NRG1 |
| BLM |
| SEMA3D |
| CHDH |
| HTR4 |
| GLT8D2 |
| SNCA |
| FAM46B |
| TUBA3E |
| NPTX2 |
| DIO2 |
| SCUBE2 |
| MAPK10 |
| LCN6 |
| MATN2 |
| CA14 |
| SLC16A9 |
| KLHL41 |
| NREP |
| FREM1 |
| CCL5 |
| EDA2R |
| ITGBL1 |
| PLCE1 |
| SVEP1 |
| PODN |
| ECM2 |
| MNS1 |
| MOXD1 |
| CTSK |
| DPT |
| PDE5A |
| CCDC3 |
| OLFML1 |
| NRK |
| PTN |
| MFAP4 |
| PLEKHH2 |
| CRISPLD1 |
| AQP3 |
| FNDC1 |
| LINC00670 |
| GSTM5 |
| CCDC80 |
| SULF1 |
| LRRC17 |
| RASL11B |
| SMOC2 |
| C1orf105 |
| UCHL1 |
| IGSF10 |
| MME |
| NAP1L3 |
| PHLDA1 |
| OMD |
| ETNPPL |
| IFI44L |
| LUM |
| RGS4 |
| LTBP2 |
| SHISA3 |
| THBS4 |
| PI16 |
| METTL7B |
| SLCO4A1 |
| FMOD |
| FRZB |
| OGN |
| ANKRD2 |
| SGPP2 |
| MXRA5 |
| HAPLN1 |
| CYP4B1 |
| FCN3 |
| MYH6 |
| IL1RL1 |
| ASPN |
| SFRP4 |
| SERPINA3 |
| NPPA |

Supplementary Box 3 Genes in turquoise module.

| APOBEC3C |
| --- |
| LINC00472 |
| DMAC2 |
| SYNE1 |
| HMGCL |
| HADHB |
| SBNO2 |
| MYCT1 |
| SYT7 |
| COL6A2 |
| SCAPER |
| RRAGD |
| RAP2B |
| FMNL1 |
| LMAN2L |
| DUSP14 |
| CBR4 |
| N6AMT1 |
| CITED4 |
| UNC5C |
| EHF |
| COX18 |
| PPP1R13L |
| TTC39B |
| KSR1 |
| MFAP2 |
| CYBA |
| RALGPS1 |
| BMP1 |
| DENND1B |
| SELENOI |
| SATB1 |
| ATP5PO |
| RAB3IP |
| ATG4D |
| SCARNA12 |
| GNPDA2 |
| CALCOCO2 |
| MRPL33 |
| KAT2B |
| TBC1D4 |
| FILIP1 |
| FAM96A |
| LRP10 |
| DDB2 |
| AAMDC |
| PIGN |
| KCNK15 |
| NEBL |
| RASGRP4 |
| CREB3L2 |
| PPP2R3B |
| SNAPC1 |
| ARHGAP4 |
| TSHZ3 |
| DECR1 |
| BBS4 |
| TOM1L2 |
| ALAS1 |
| SPARC |
| PLXND1 |
| RALB |
| MCCC2 |
| PCBD2 |
| FKBP11 |
| WDR12 |
| UBE2D1 |
| ZCWPW2 |
| OAF |
| EYA2 |
| CALHM2 |
| CFL1 |
| EEF1B2 |
| SUCLG2 |
| SIRT5 |
| CASP8 |
| TMEM243 |
| RNF24 |
| LRRC49 |
| GKAP1 |
| PPARA |
| LRRK1 |
| TOMM40L |
| SIPA1L1 |
| UTP15 |
| NRBF2 |
| SLC25A1 |
| BHLHB9 |
| CDKN2B |
| GPR132 |
| NDUFS6 |
| ARMCX1 |
| NKIRAS1 |
| DAP |
| NAPEPLD |
| DOK2 |
| DBT |
| IRAK1BP1 |
| HSP90AB3P |
| EMILIN1 |
| C3orf33 |
| GDPGP1 |
| PKP2 |
| SLC25A40 |
| NDUFAF5 |
| NDUFA3 |
| TCIRG1 |
| SNRPC |
| RHOH |
| AMPD2 |
| LTBP3 |
| RAB3C |
| HIBADH |
| PRAF2 |
| TNFRSF1B |
| MTSS1L |
| SRGAP2 |
| PIWIL4 |
| MLX |
| KIAA0930 |
| PLD1 |
| FAM114A1 |
| ADAMTSL2 |
| SDC3 |
| GRIN3A |
| PERP |
| MRPL16 |
| THAP10 |
| CNKSR2 |
| NDUFA1 |
| CD27 |
| ESRRA |
| AGTPBP1 |
| MMACHC |
| TTLL1 |
| DLAT |
| PTMS |
| TP53 |
| CCNL1 |
| ATL3 |
| PRPS2 |
| IQGAP1 |
| PINK1-AS |
| COA6 |
| MTERF2 |
| FCGRT |
| COQ9 |
| ACAT1 |
| TEK |
| ERMP1 |
| PLEKHA5 |
| TRMT61B |
| PDP1 |
| MZT2A |
| PTGIR |
| ZC2HC1C |
| ARMT1 |
| KLHDC1 |
| SDC2 |
| VAV1 |
| MRPL41 |
| EPS8 |
| ZNF33B |
| C19orf47 |
| ITPRIPL2 |
| NDUFS1 |
| CLEC10A |
| TRIM38 |
| ARV1 |
| SEC61B |
| C6orf106 |
| SIRT3 |
| NDUFB6 |
| ME2 |
| TFB1M |
| EBP |
| SIAE |
| KCNN2 |
| BDKRB1 |
| ELMO1 |
| SDC4 |
| TPM4 |
| SLC14A1 |
| ZC3H12B |
| ATP5F1D |
| RASA3 |
| TTC1 |
| SFXN3 |
| DPY19L4 |
| HDAC11 |
| TWF1 |
| GPSM3 |
| SERP1 |
| PDIA5 |
| PLN |
| TMEM185A |
| CRABP2 |
| BZW2 |
| EPM2A |
| MAML2 |
| RMND5A |
| NFE2L1 |
| C11orf65 |
| MYL6 |
| BLID |
| HSPB8 |
| EVC |
| PLXNA3 |
| EPM2AIP1 |
| SETBP1 |
| GLI3 |
| CKMT2 |
| SLC1A5 |
| PGBD5 |
| ANKRD44 |
| JAK3 |
| RAVER2 |
| TMEM242 |
| RPS6KA1 |
| TOB1 |
| NDUFC1 |
| NCOA7 |
| IVD |
| INHBB |
| FRMD3 |
| GON7 |
| GYS1 |
| PNPLA4 |
| ATP2A2 |
| TECRL |
| MORN2 |
| VDR |
| RAP1B |
| NDUFS7 |
| TMEM38B |
| FBXO45 |
| PDHB |
| DHRS9 |
| BEX3 |
| ATP1B1 |
| SLC2A11 |
| RGS5 |
| ALDH18A1 |
| FBLN7 |
| HSDL1 |
| KIF3A |
| SMCO4 |
| ACADM |
| MRPS33 |
| GUCD1 |
| GDPD5 |
| FUNDC1 |
| SULF2 |
| AFAP1 |
| ZNF330 |
| SLC30A7 |
| SH3BGRL3 |
| CASP4 |
| KRBA2 |
| VAV3 |
| COL6A1 |
| GSN |
| HCCS |
| IRX4 |
| SORD |
| AKTIP |
| QRSL1 |
| MRPL34 |
| UQCRB |
| PPTC7 |
| C15orf61 |
| HTR2A |
| PRR5L |
| DYNLL1 |
| HCST |
| TFDP2 |
| MYO5A |
| TMEM223 |
| CDYL2 |
| ADAMTS3 |
| SLC38A1 |
| DNAJC19 |
| WWTR1 |
| CD36 |
| MOAP1 |
| FAM20C |
| ZNF280B |
| SNTA1 |
| DCUN1D5 |
| MSH2 |
| PRDX5 |
| EIF1B |
| C2CD2 |
| RPP25L |
| AFG3L2 |
| MRPL46 |
| DLD |
| CRY2 |
| C6orf136 |
| TUFT1 |
| MDK |
| JDP2 |
| MAML3 |
| FMO1 |
| GAS1 |
| REP15 |
| GATB |
| PQLC3 |
| DNAJC28 |
| SLC16A1 |
| TREM2 |
| PTCD2 |
| NFKBID |
| SLC43A2 |
| PTBP1 |
| NR2F1 |
| ARIH2 |
| STXBP2 |
| SLC25A25 |
| CDH2 |
| BASP1 |
| ECH1 |
| NT5DC1 |
| CORO1C |
| SPRY1 |
| PDK2 |
| FAM20A |
| DCP1B |
| UQCRFS1 |
| PNPLA8 |
| ECM1 |
| NUSAP1 |
| PLAG1 |
| LYRM7 |
| ZNF772 |
| PRICKLE2 |
| NECAB3 |
| VASP |
| GK3P |
| DACH1 |
| SEC23B |
| CCT5 |
| MYO1E |
| LAPTM4B |
| UGP2 |
| ABCC9 |
| MFSD12 |
| ACBD5 |
| SELENOM |
| KIRREL1 |
| SIRPA |
| POT1 |
| MT1B |
| C11orf74 |
| MIR30C2 |
| NUBPL |
| HINT3 |
| XPNPEP2 |
| MARCKS |
| SUOX |
| NIPAL3 |
| FAM110B |
| CCSER1 |
| NSMF |
| UPB1 |
| TMEM165 |
| PIP4K2A |
| PPP2R1B |
| COL4A2 |
| LINC00467 |
| SNORA54 |
| CAP2 |
| RIMKLA |
| KLHL30 |
| ANXA5 |
| OSBPL10 |
| TGFB3 |
| SIPA1L2 |
| IRAK4 |
| FKBP4 |
| ACTB |
| DAND5 |
| SLC25A4 |
| TMX4 |
| UCHL3 |
| PLCB2 |
| HCAR2 |
| CPXM1 |
| RHBDF2 |
| CLDN11 |
| TMEM268 |
| ADAMTSL4-AS1 |
| PRELID1 |
| ANK3 |
| PROCR |
| AK1 |
| ILVBL |
| ATP5F1A |
| CSF2RB |
| TGFB1I1 |
| SNORD95 |
| GREB1 |
| CD300A |
| SNORA68 |
| FAM210A |
| NXPE3 |
| MRS2 |
| HAX1 |
| QPRT |
| PLCD3 |
| RGS9BP |
| PLEKHO2 |
| ACLY |
| ACTG1 |
| MOCS2 |
| HIST2H2BE |
| RALGPS2 |
| FAM162A |
| DSG2 |
| SPSB1 |
| ZNF780B |
| TTYH2 |
| MOSPD1 |
| PNMA8A |
| ALDH6A1 |
| DPH6 |
| QDPR |
| HMBS |
| ITGB4 |
| GPM6A |
| TACR1 |
| TANC1 |
| RPP14 |
| TMEM30B |
| PRKAA2 |
| KLHDC3 |
| HAPLN3 |
| CMTM3 |
| MRPS23 |
| SYNE3 |
| ATP5IF1 |
| DGKA |
| CRIP2 |
| CKM |
| SNORD56B |
| PHKA2 |
| ABCC3 |
| NUDT6 |
| RFESD |
| CMIP |
| RANBP6 |
| C5orf63 |
| DPY19L3 |
| NEK6 |
| BST1 |
| AP1S2 |
| BTG3 |
| SPR |
| SHC3 |
| RNF43 |
| PPIL1 |
| TMEM65 |
| NIPSNAP3B |
| LAMB1 |
| LMLN |
| SH3BP5 |
| TUBB4B |
| FAM57A |
| MRPS12 |
| KLF6 |
| INPP5D |
| CPEB3 |
| MSN |
| APOO |
| MINDY1 |
| KLRG1 |
| TIMM8B |
| RAPH1 |
| TFE3 |
| TSPAN12 |
| GNG12 |
| PFN2 |
| EPDR1 |
| RNASET2 |
| MAPRE3 |
| HIST1H1B |
| IL17RA |
| SYPL2 |
| UFSP2 |
| MAN2B1 |
| STX2 |
| OGFRL1 |
| ADGRG2 |
| ZNF415 |
| ALPK1 |
| NDUFAB1 |
| REEP1 |
| RNF207 |
| CYB5R2 |
| TIMP3 |
| RRS1 |
| PRKAB2 |
| LIMCH1 |
| PARVB |
| ACADS |
| ELF4 |
| DUSP4 |
| ADH5 |
| TIMP2 |
| PTER |
| P2RX1 |
| FMNL3 |
| S100A6 |
| LDOC1 |
| PTPRJ |
| CAP1 |
| DHRS11 |
| RAB6B |
| HACD1 |
| CSGALNACT1 |
| PRKCB |
| PCSK5 |
| SDHA |
| SLC27A1 |
| TIMM21 |
| SOAT1 |
| FAM173B |
| NAALADL2 |
| CAPG |
| ITGA4 |
| IRAK2 |
| PARM1 |
| ROGDI |
| MRPL21 |
| AIFM1 |
| LMO7 |
| HYAL1 |
| ASB10 |
| TRAF5 |
| NUDT5 |
| JUP |
| LST1 |
| TIMM8A |
| PPM1L |
| NFKB2 |
| ORAI2 |
| DNM1 |
| NUDT12 |
| MRPS36 |
| FHIT |
| EEF1A2 |
| COL4A1 |
| FAM107B |
| TCEA3 |
| PYCARD |
| CPVL |
| ATP11C |
| ZNF252P |
| GAS8 |
| TBC1D2 |
| PATJ |
| IMPA2 |
| SRR |
| MR1 |
| SNAI1 |
| PPP1R12B |
| NCEH1 |
| EXOG |
| LONRF2 |
| OSBP2 |
| NNAT |
| DMXL2 |
| PDK1 |
| SYTL2 |
| SKIL |
| ADAL |
| ACOT2 |
| MTFR1L |
| PILRA |
| SLC29A2 |
| URB1-AS1 |
| SPON2 |
| TLR8 |
| KLHDC2 |
| ZNF91 |
| FAM229B |
| TMEM139 |
| PRUNE1 |
| ZNF385A |
| RAB23 |
| PHKA1 |
| KCNJ11 |
| PEX7 |
| SGCA |
| USP13 |
| CA8 |
| SLC35F2 |
| NDUFB3 |
| KBTBD3 |
| SNORA6 |
| NDRG4 |
| C17orf75 |
| PDZD2 |
| USP2 |
| RWDD2B |
| CSGALNACT2 |
| RIDA |
| FFAR4 |
| TLR5 |
| CSF1 |
| NMB |
| LOC100130331 |
| CYYR1 |
| POPDC2 |
| ARNTL2 |
| IKBIP |
| ATP6V0E2 |
| SMIM5 |
| PXMP4 |
| MT1DP |
| RASSF9 |
| HSD17B3 |
| SRGAP1 |
| CEBPA |
| CACNB1 |
| LACTB2 |
| ARHGAP5-AS1 |
| LTBR |
| NTAN1 |
| FAM129A |
| FAHD1 |
| AMD1 |
| NDUFA8 |
| LIMA1 |
| FARP1 |
| C5 |
| DDR2 |
| CETN3 |
| RUNX2 |
| MRPS25 |
| ZDHHC15 |
| DIRAS1 |
| LRRC25 |
| CTTNBP2 |
| COL5A1 |
| ARHGAP20 |
| ELOVL5 |
| ARHGDIA |
| CLYBL |
| NNT |
| SLC12A7 |
| TUBE1 |
| SLC25A11 |
| TBC1D2B |
| PEX12 |
| CSRP1 |
| MPC1 |
| CAV3 |
| PPP1R3B |
| STARD7 |
| SCRN3 |
| IFI16 |
| GMPR |
| UBE2U |
| SLC25A12 |
| KLHL6 |
| HSDL2 |
| OSR2 |
| OTUD4 |
| PKIA |
| IGFBP6 |
| TRIM14 |
| AURKA |
| NKX2-5 |
| ZMYND12 |
| INSIG1 |
| BCL11A |
| LIAS |
| HOMER1 |
| DAPP1 |
| SPATA17 |
| IDH2 |
| UQCRH |
| COQ5 |
| TMSB10 |
| CXADR |
| SLC3A2 |
| CDK18 |
| PRKN |
| PDE3A |
| RASD2 |
| DSE |
| CSF2RA |
| DNAJB9 |
| PREX1 |
| MDH1B |
| DENND2D |
| HADH |
| ABHD1 |
| FGD2 |
| OBSCN |
| EIF1AX |
| AKAP6 |
| CMTM7 |
| DYNC1I1 |
| SLC41A1 |
| SMC2 |
| FAM49A |
| TSPAN8 |
| ACOX2 |
| SLC50A1 |
| OXCT1 |
| DOT1L |
| SLC35F1 |
| PSD3 |
| TACC2 |
| FASTKD1 |
| OMA1 |
| CEACAM1 |
| ADGRA2 |
| TMEM106A |
| GOT1 |
| SREBF1 |
| TRANK1 |
| INPP5J |
| NET1 |
| PAQR9 |
| HAND2 |
| HMGN3 |
| LILRB1 |
| PERM1 |
| PPARGC1B |
| ACTN1 |
| AXL |
| SNORA37 |
| SPI1 |
| FAM217B |
| KCNH2 |
| DGLUCY |
| MKI67 |
| ISOC1 |
| MYBPC3 |
| TRIM54 |
| GLIS3 |
| DTWD2 |
| PTGFR |
| LEF1 |
| B4GAT1 |
| FNDC4 |
| MGP |
| PIFO |
| ECHDC3 |
| FAM78A |
| ACAD10 |
| PACSIN3 |
| ENTPD1 |
| DLEU1 |
| CFHR1 |
| TLR1 |
| IL13RA1 |
| ANXA4 |
| TET3 |
| SLC16A2 |
| BCKDHB |
| APOE |
| CPT2 |
| ARID5A |
| LCLAT1 |
| EML4 |
| TNFAIP2 |
| SMAP2 |
| SMIM30 |
| RHOF |
| CNNM4 |
| TNIK |
| TAF4B |
| EPN3 |
| RAB30 |
| ARHGAP18 |
| RBM24 |
| PELI1 |
| ROBO1 |
| E2F5 |
| MAN1A1 |
| BRINP1 |
| SLC4A3 |
| 11-Sep |
| MLYCD |
| TLE3 |
| ACP5 |
| B4GALT6 |
| BCL2 |
| PCMTD2 |
| LINC01140 |
| CPTP |
| KRT18 |
| SNED1 |
| COQ3 |
| RAB31 |
| XPO4 |
| MCMDC2 |
| ALDH7A1 |
| WISP1 |
| NBEA |
| CEP126 |
| MLIP |
| PPP1R14C |
| MMP14 |
| NOTCH2 |
| LRP1 |
| FTL |
| PPP2R3A |
| HLTF |
| SLC37A2 |
| RASGEF1B |
| RAB27A |
| GCNT1 |
| PLK3 |
| GALNT16 |
| HTRA1 |
| MXRA8 |
| ESRRG |
| CD37 |
| CKB |
| SLC4A4 |
| ARHGEF26 |
| PCK2 |
| EGFLAM |
| SLC39A14 |
| KCND3 |
| MAP3K8 |
| TGFB1 |
| ADGRG6 |
| PPP1R13B |
| SYK |
| ZYX |
| TRAT1 |
| NUPR1 |
| NDUFA5 |
| ZNF233 |
| SNORD15A |
| THNSL1 |
| FAM169A |
| SEC24D |
| ANGPTL2 |
| OSGEPL1 |
| 1-Mar |
| C8orf37 |
| MPI |
| MYLK |
| MYL3 |
| FMNL2 |
| TMEM143 |
| CD28 |
| GOLM1 |
| MLPH |
| KRT8 |
| MARCO |
| SLC24A3 |
| FAM107A |
| HIST1H2AK |
| MYOM1 |
| TMEM144 |
| WDR31 |
| ADSSL1 |
| SYT13 |
| TNFRSF1A |
| ACADSB |
| TBX3 |
| VIM |
| CCDC6 |
| C11orf21 |
| ITGA10 |
| RYR2 |
| TTYH3 |
| ZPR1 |
| IGKC |
| MAFF |
| PLCL1 |
| FBLN5 |
| IKZF1 |
| CLEC7A |
| CLIC1 |
| ARID5B |
| PDE7B |
| PGAP2 |
| LSMEM2 |
| TYROBP |
| TDRD1 |
| FN3K |
| SLC36A1 |
| STK33 |
| CDNF |
| ABHD10 |
| HIST1H3B |
| PIK3AP1 |
| DZIP3 |
| ARRB2 |
| PIK3R5 |
| CAPS2 |
| SCARA3 |
| C1RL |
| AKAP1 |
| POPDC3 |
| HMOX2 |
| RAB8B |
| PTGER3 |
| MYO5C |
| LOC100128288 |
| BOK |
| RARRES2 |
| TANC2 |
| ANXA3 |
| BBS2 |
| SLC8A1 |
| SLC20A1 |
| SNHG12 |
| PCCB |
| PTP4A3 |
| TRPS1 |
| TNFAIP8L3 |
| PPARGC1A |
| ELN |
| SGCD |
| ATP8B4 |
| ARHGAP15 |
| ANKMY2 |
| CLCN4 |
| ALOX15B |
| TGFBI |
| SERPING1 |
| HOOK1 |
| DDO |
| PLCB4 |
| LPAR1 |
| WFS1 |
| LPCAT4 |
| HNMT |
| IFITM3 |
| CA12 |
| MCAM |
| CRYBG1 |
| CEP85 |
| TRUB1 |
| STRADB |
| ST8SIA6 |
| ADHFE1 |
| PANK1 |
| FYCO1 |
| TRIM45 |
| SNORA71D |
| TMEM43 |
| FERMT3 |
| SRL |
| SUSD1 |
| IPP |
| XYLT1 |
| SHTN1 |
| FAM160A1 |
| BAZ1A |
| CERCAM |
| AIG1 |
| PTPN6 |
| TGIF1 |
| TESC |
| MYD88 |
| C11orf71 |
| STEAP1 |
| CSPG4 |
| PLSCR1 |
| MILR1 |
| FLNA |
| PLA2R1 |
| PIP5K1B |
| TLR6 |
| LDLRAD3 |
| MEIS1 |
| RAB9B |
| KCNMB1 |
| G6PD |
| PGAM2 |
| B3GLCT |
| NME5 |
| NRAP |
| WASF1 |
| PLOD2 |
| WNK2 |
| RBM47 |
| WISP2 |
| PRKCD |
| TST |
| CHST15 |
| SLC16A7 |
| LDHD |
| GNA15 |
| PTGR2 |
| MYO1F |
| SIGLEC1 |
| MMP2 |
| TUBA8 |
| SLC25A20 |
| CLU |
| THSD7A |
| ALDH5A1 |
| ENC1 |
| CD300LG |
| RTN4IP1 |
| IGFBP4 |
| BEST1 |
| ANXA2P2 |
| MYH9 |
| RAC2 |
| RSPO3 |
| LPAR3 |
| NUDT8 |
| RBFOX1 |
| PCYOX1 |
| DSP |
| EGF |
| LYPLAL1 |
| CLEC5A |
| LOXL1 |
| MAOB |
| SUSD2 |
| ENO1 |
| S100A4 |
| ETFDH |
| NPY1R |
| HIGD1B |
| DSEL |
| ID4 |
| PLPP7 |
| MCTP1 |
| TIGAR |
| PDGFRA |
| COL8A1 |
| PRSS23 |
| PROX1 |
| RALYL |
| KCNMA1 |
| COL5A2 |
| FST |
| OTULINL |
| CPN2 |
| ITGB1BP2 |
| SAMSN1 |
| CAND2 |
| COX7B |
| ACSS1 |
| MT1JP |
| MTUS2 |
| PXDC1 |
| GMFG |
| HAND1 |
| ADRA1A |
| CYP27A1 |
| PCOLCE |
| MIR107 |
| STAB1 |
| IFITM2 |
| FITM2 |
| SNORD12C |
| COL6A3 |
| FAM102B |
| TBXAS1 |
| RPS6KA5 |
| ALDH1A3 |
| C15orf41 |
| IRS2 |
| BOC |
| LGI2 |
| SLC9A9 |
| SERPINF1 |
| DPF3 |
| SNORA7B |
| RPPH1 |
| MYOM3 |
| ASB5 |
| ASB4 |
| EMP1 |
| ADCY3 |
| MTTP |
| GJA1 |
| CD52 |
| HEYL |
| LBP |
| PLSCR4 |
| C11orf96 |
| ANXA1 |
| NFKBIZ |
| CHST11 |
| TMEM38A |
| EPB41L3 |
| DUSP19 |
| THSD4 |
| LIN9 |
| ERV3-1 |
| COTL1 |
| PDE1C |
| PLXDC2 |
| TMEM116 |
| BICC1 |
| FRK |
| TMEM119 |
| ENO2 |
| RCN3 |
| KBTBD12 |
| CD163L1 |
| CABLES1 |
| RHOU |
| FHOD3 |
| TSHZ2 |
| CA5B |
| SERPINH1 |
| SMOC1 |
| TSPAN9 |
| KCNJ2 |
| CD3E |
| KLHL24 |
| NLGN1 |
| MRC2 |
| ITK |
| PTDSS1 |
| PXDN |
| SIRPB2 |
| ALS2CR12 |
| CTNNA3 |
| PDIA4 |
| SLCO2B1 |
| SQLE |
| SPHK1 |
| HCLS1 |
| PXDNL |
| EHHADH |
| BCO2 |
| SCRG1 |
| RASGRP1 |
| SECTM1 |
| SLIT2 |
| GBP5 |
| VTRNA1-3 |
| B3GALNT1 |
| ITGA11 |
| PARVG |
| NLRP3 |
| ADAM23 |
| IL4R |
| BNC2 |
| HIST1H3E |
| MT1G |
| ANXA2 |
| PFKM |
| TFEC |
| ITGAM |
| NDNF |
| EMP3 |
| FABP6 |
| NPL |
| F8 |
| PTPN22 |
| NRP2 |
| NTRK3 |
| ITGAL |
| SNRNP25 |
| FBLN2 |
| MT2A |
| HRC |
| LHFPL2 |
| CSF1R |
| LILRB2 |
| CDCA7L |
| RPL3L |
| MYO1D |
| FNDC5 |
| FKBP10 |
| TKT |
| HSPA4L |
| DOCK8 |
| LINC01128 |
| STK17B |
| HAND2-AS1 |
| TMEM159 |
| HSPA6 |
| PHACTR1 |
| LMOD1 |
| NGFR |
| GAS2 |
| GLIPR2 |
| PTPN13 |
| HAVCR2 |
| ITGA3 |
| PAPPA |
| CMBL |
| THBS3 |
| PTPRS |
| MTHFD1L |
| LDB3 |
| GPR65 |
| TCP11L2 |
| ALDOC |
| SPX |
| ANTXR1 |
| TNFSF13B |
| DCUN1D2 |
| AOC3 |
| TSC22D3 |
| NCF4 |
| EPHA3 |
| UNC45B |
| PAK1 |
| ADCY5 |
| CLDN1 |
| SH3TC2 |
| KLHL7 |
| TPCN1 |
| IQGAP2 |
| CD4 |
| CLEC4E |
| RGN |
| IL10RA |
| DPY19L2 |
| IRAK3 |
| CD86 |
| PLP2 |
| PTPN3 |
| PLA2G4A |
| DAPK1 |
| UGDH |
| GRB14 |
| SLC26A10 |
| GPR183 |
| KDELR3 |
| HHATL |
| HSPB3 |
| KLHL31 |
| CORO1A |
| BDH1 |
| AIF1 |
| SLC30A2 |
| HGF |
| CFB |
| SLC25A34 |
| MMP15 |
| FBN1 |
| LOXL2 |
| LRRC2 |
| SNORA49 |
| DOCK2 |
| CD74 |
| KYNU |
| FGR |
| RUNX1 |
| SNORA52 |
| CACNA2D3 |
| SNORA41 |
| SLAMF6 |
| ACKR1 |
| ANO5 |
| ENPP5 |
| SIGLEC9 |
| SDSL |
| RAI14 |
| SNORD94 |
| HLA-DMA |
| ANGPT1 |
| LCP2 |
| PAPSS2 |
| SLC39A10 |
| C12orf75 |
| COQ8A |
| FRMPD4 |
| MCUB |
| TTLL7 |
| HCK |
| BGN |
| AKR1C3 |
| FITM1 |
| NALCN |
| ITGAX |
| CLSTN2 |
| CCL19 |
| DPY19L2P2 |
| GCNT2 |
| AKAP12 |
| PVR |
| PTPRF |
| FOSL2 |
| TENM2 |
| STRIP2 |
| SRPX2 |
| APOBEC2 |
| JAML |
| CYTH4 |
| BCL6 |
| NTM |
| SCARNA6 |
| AHNAK2 |
| PDZRN3 |
| TMEM37 |
| SLC2A4 |
| MYLK3 |
| PRDM1 |
| TPRG1 |
| SGK2 |
| GNA14 |
| MAFB |
| SNORA75 |
| MIRLET7A2 |
| C1S |
| SAT1 |
| RNASE6 |
| MYH7B |
| CCDC102B |
| SNORA21 |
| FBP1 |
| NCS1 |
| BMP5 |
| ACADL |
| DPYSL3 |
| SLPI |
| CRLF1 |
| NDUFAF1 |
| CHN2 |
| ALDH1L2 |
| GPD1L |
| ASB12 |
| SLC7A7 |
| VAMP8 |
| HILPDA |
| HERC6 |
| XG |
| TSKU |
| EVI2A |
| ADPRHL1 |
| MMP19 |
| CD48 |
| NAP1L2 |
| ENO3 |
| COQ10A |
| CD84 |
| MUM1L1 |
| HIST1H3I |
| FGL2 |
| MLF1 |
| FHL2 |
| KCNMB2 |
| CD96 |
| BCAT1 |
| SELPLG |
| CD200 |
| ADAMTS2 |
| FYB1 |
| C2 |
| IL1RAPL1 |
| TNFSF8 |
| S100A11 |
| CXCL16 |
| ADGRE2 |
| NCF2 |
| NEK10 |
| C15orf59 |
| ITGB3 |
| DOCK10 |
| DPY19L2P1 |
| SCARNA10 |
| ARRDC3 |
| TMEM45A |
| PEBP4 |
| SESN3 |
| RMRP |
| SGCG |
| MYOM2 |
| KLKB1 |
| LAIR1 |
| RETREG1 |
| CEBPB |
| EFHC2 |
| RGS6 |
| CD248 |
| PTGER2 |
| THEMIS2 |
| APBB1IP |
| CCDC113 |
| GGT5 |
| OLFM2 |
| VNN1 |
| CLGN |
| PAIP2B |
| DOCK11 |
| ERRFI1 |
| PYGL |
| PRUNE2 |
| RAB3A |
| FMO4 |
| FIBIN |
| C5AR1 |
| ABI3BP |
| HMOX1 |
| CHRM2 |
| CEMIP2 |
| KCNT2 |
| ADAM12 |
| SNORA10 |
| COL12A1 |
| CDH11 |
| PYGM |
| FLRT2 |
| ISLR |
| CLMP |
| CACNB2 |
| SLC2A12 |
| NT5E |
| C1R |
| CD69 |
| ART3 |
| LMOD3 |
| FBLN1 |
| IRF8 |
| C1QA |
| LILRB4 |
| SLITRK4 |
| SAMHD1 |
| PLAT |
| GADD45B |
| BLM |
| IL2RG |
| PFKFB3 |
| CHDH |
| FCGR2B |
| SLIT3 |
| PTGIS |
| HLA-DMB |
| TRIB1 |
| DEPP1 |
| SLC25A30 |
| DPYSL4 |
| P2RX3 |
| TBX15 |
| SH3PXD2B |
| KY |
| RASSF2 |
| ITGB2 |
| TREM1 |
| CR1 |
| FN1 |
| ADAM11 |
| HIST1H2BM |
| PTPRC |
| NTRK2 |
| CTSS |
| EPHX2 |
| COL1A2 |
| OSMR |
| MS4A6A |
| PLVAP |
| SLA |
| NABP1 |
| PPP1R3A |
| OLFML2B |
| PHGDH |
| SLC41A2 |
| CMKLR1 |
| FCGR3A |
| IL18 |
| ASB2 |
| SNORD53 |
| TNNT3 |
| MT1F |
| SLC38A3 |
| THBS2 |
| IL2RA |
| GLIPR1 |
| SCUBE2 |
| VGLL3 |
| SLC39A8 |
| CXCR4 |
| MAPK10 |
| SNORA74A |
| CD44 |
| NCKAP1L |
| CA14 |
| SCN2B |
| RORB |
| TBX5 |
| IDI2-AS1 |
| PFKFB2 |
| CDKN1A |
| KLHL41 |
| ALOX5 |
| PLAUR |
| TNFAIP3 |
| RGS2 |
| SNORA3A |
| THY1 |
| CYTIP |
| DKK1 |
| SLAMF8 |
| IL1R1 |
| SMYD1 |
| SERPINA1 |
| ATP1A3 |
| EFEMP1 |
| PLEK |
| AOAH |
| ITGBL1 |
| MID1 |
| COL3A1 |
| RGS1 |
| CCDC141 |
| FAM69C |
| SVEP1 |
| FGF12 |
| EVI2B |
| HJV |
| PODN |
| TLL1 |
| ITGA8 |
| LRRC39 |
| TOGARAM2 |
| IGH |
| PPP1R1C |
| GPR22 |
| TMEM182 |
| CD68 |
| CTSK |
| ASB11 |
| TAGLN |
| SPHKAP |
| DPT |
| ACTA2 |
| TXLNB |
| CEBPD |
| CCDC3 |
| MSR1 |
| COMP |
| CFH |
| PLA2G7 |
| FPR3 |
| AEBP1 |
| C1QC |
| CNTFR |
| SERPINB8 |
| C1orf162 |
| VCAM1 |
| MFAP4 |
| CALB2 |
| TLL2 |
| SPON1 |
| NUDT7 |
| PLEKHH2 |
| LCP1 |
| IGF1 |
| CRISPLD1 |
| SLC5A1 |
| TLR2 |
| MEST |
| SLC11A1 |
| PPM1K |
| CCR1 |
| NPNT |
| FCGR2A |
| LRRC14B |
| PNP |
| GPC6 |
| PRELP |
| NNMT |
| CRYM |
| CCDC80 |
| SULF1 |
| PLTP |
| ENPP2 |
| MRC1 |
| LRRC17 |
| CLIC6 |
| ZFP36 |
| FYB2 |
| C3AR1 |
| C1QTNF1 |
| LOX |
| CD53 |
| HEY2 |
| SNORA20 |
| IL7R |
| C1QB |
| COL1A1 |
| VCAN |
| LMO3 |
| SOCS3 |
| MYC |
| FAP |
| LAPTM5 |
| JUNB |
| CTGF |
| MME |
| B3GALT2 |
| CTSC |
| LY96 |
| CILP |
| ANGPT2 |
| TIMP1 |
| IGHA1 |
| FAM155B |
| ETNPPL |
| ANPEP |
| LMCD1 |
| FSD2 |
| LUM |
| ARG2 |
| GFPT2 |
| FBXO40 |
| CPNE4 |
| FCER1G |
| CPM |
| MEDAG |
| LRRC10 |
| CYP1B1 |
| SCARNA4 |
| SERPINE2 |
| THBS1 |
| RARRES1 |
| SMCO1 |
| PKHD1L1 |
| MT1A |
| FMOD |
| ASB15 |
| VSIG4 |
| SFRP2 |
| CXCL14 |
| KLHL38 |
| ACTG2 |
| SGPP2 |
| MMRN1 |
| MXRA5 |
| CHI3L1 |
| PI15 |
| CORIN |
| AOX1 |
| CP |
| MIR21 |
| MT1M |
| PRG4 |
| ASB14 |
| CHRDL1 |
| PTX3 |
| POSTN |
| VTRNA1-1 |
| SPP1 |
| SCD |
| SFRP4 |
| CXCL10 |
| TNC |
| PLA2G2A |
| SERPINE1 |
| SERPINA3 |


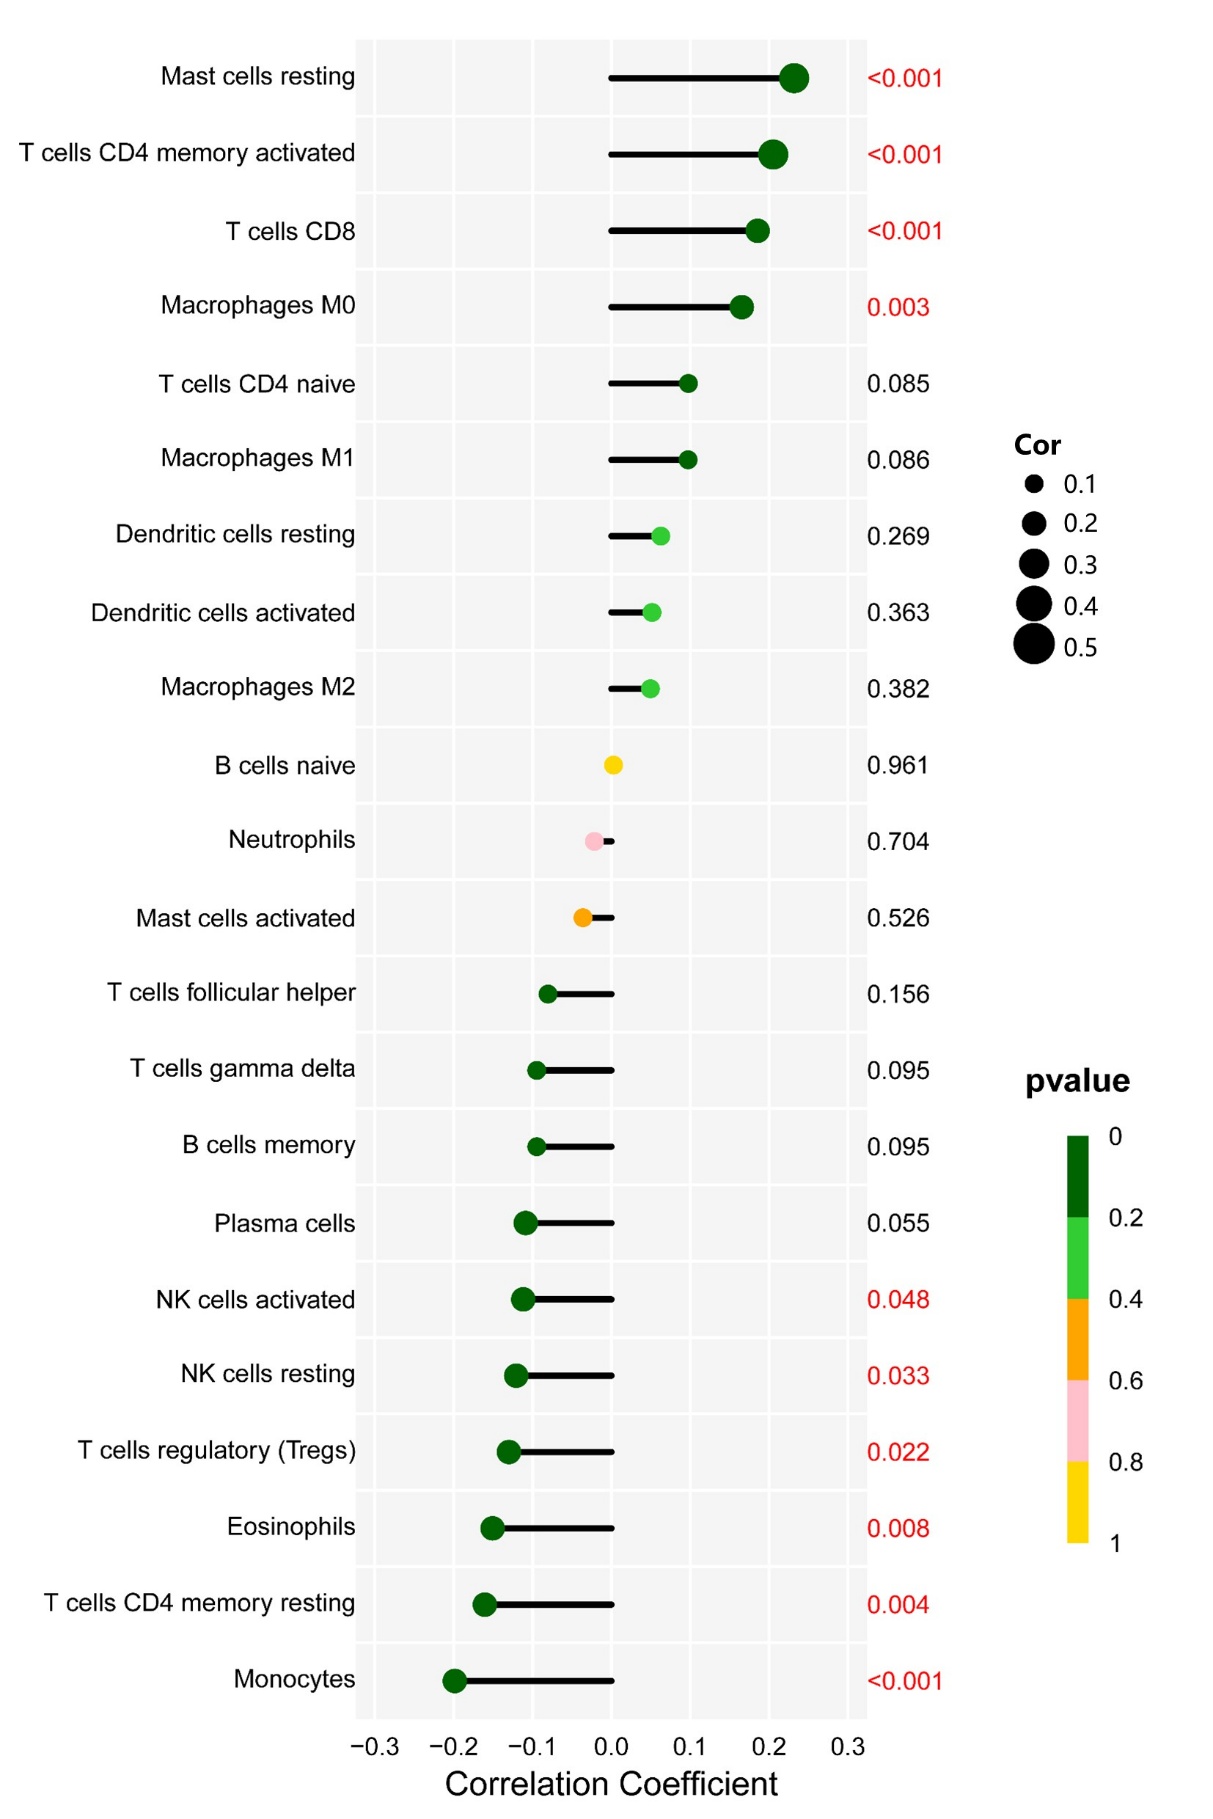


Figure S3 The correlation between ISLR and immune cells. The p < 0.05 considered statistically significant. Statistically significant results are shown in red, and non-significant results are displayed in black.


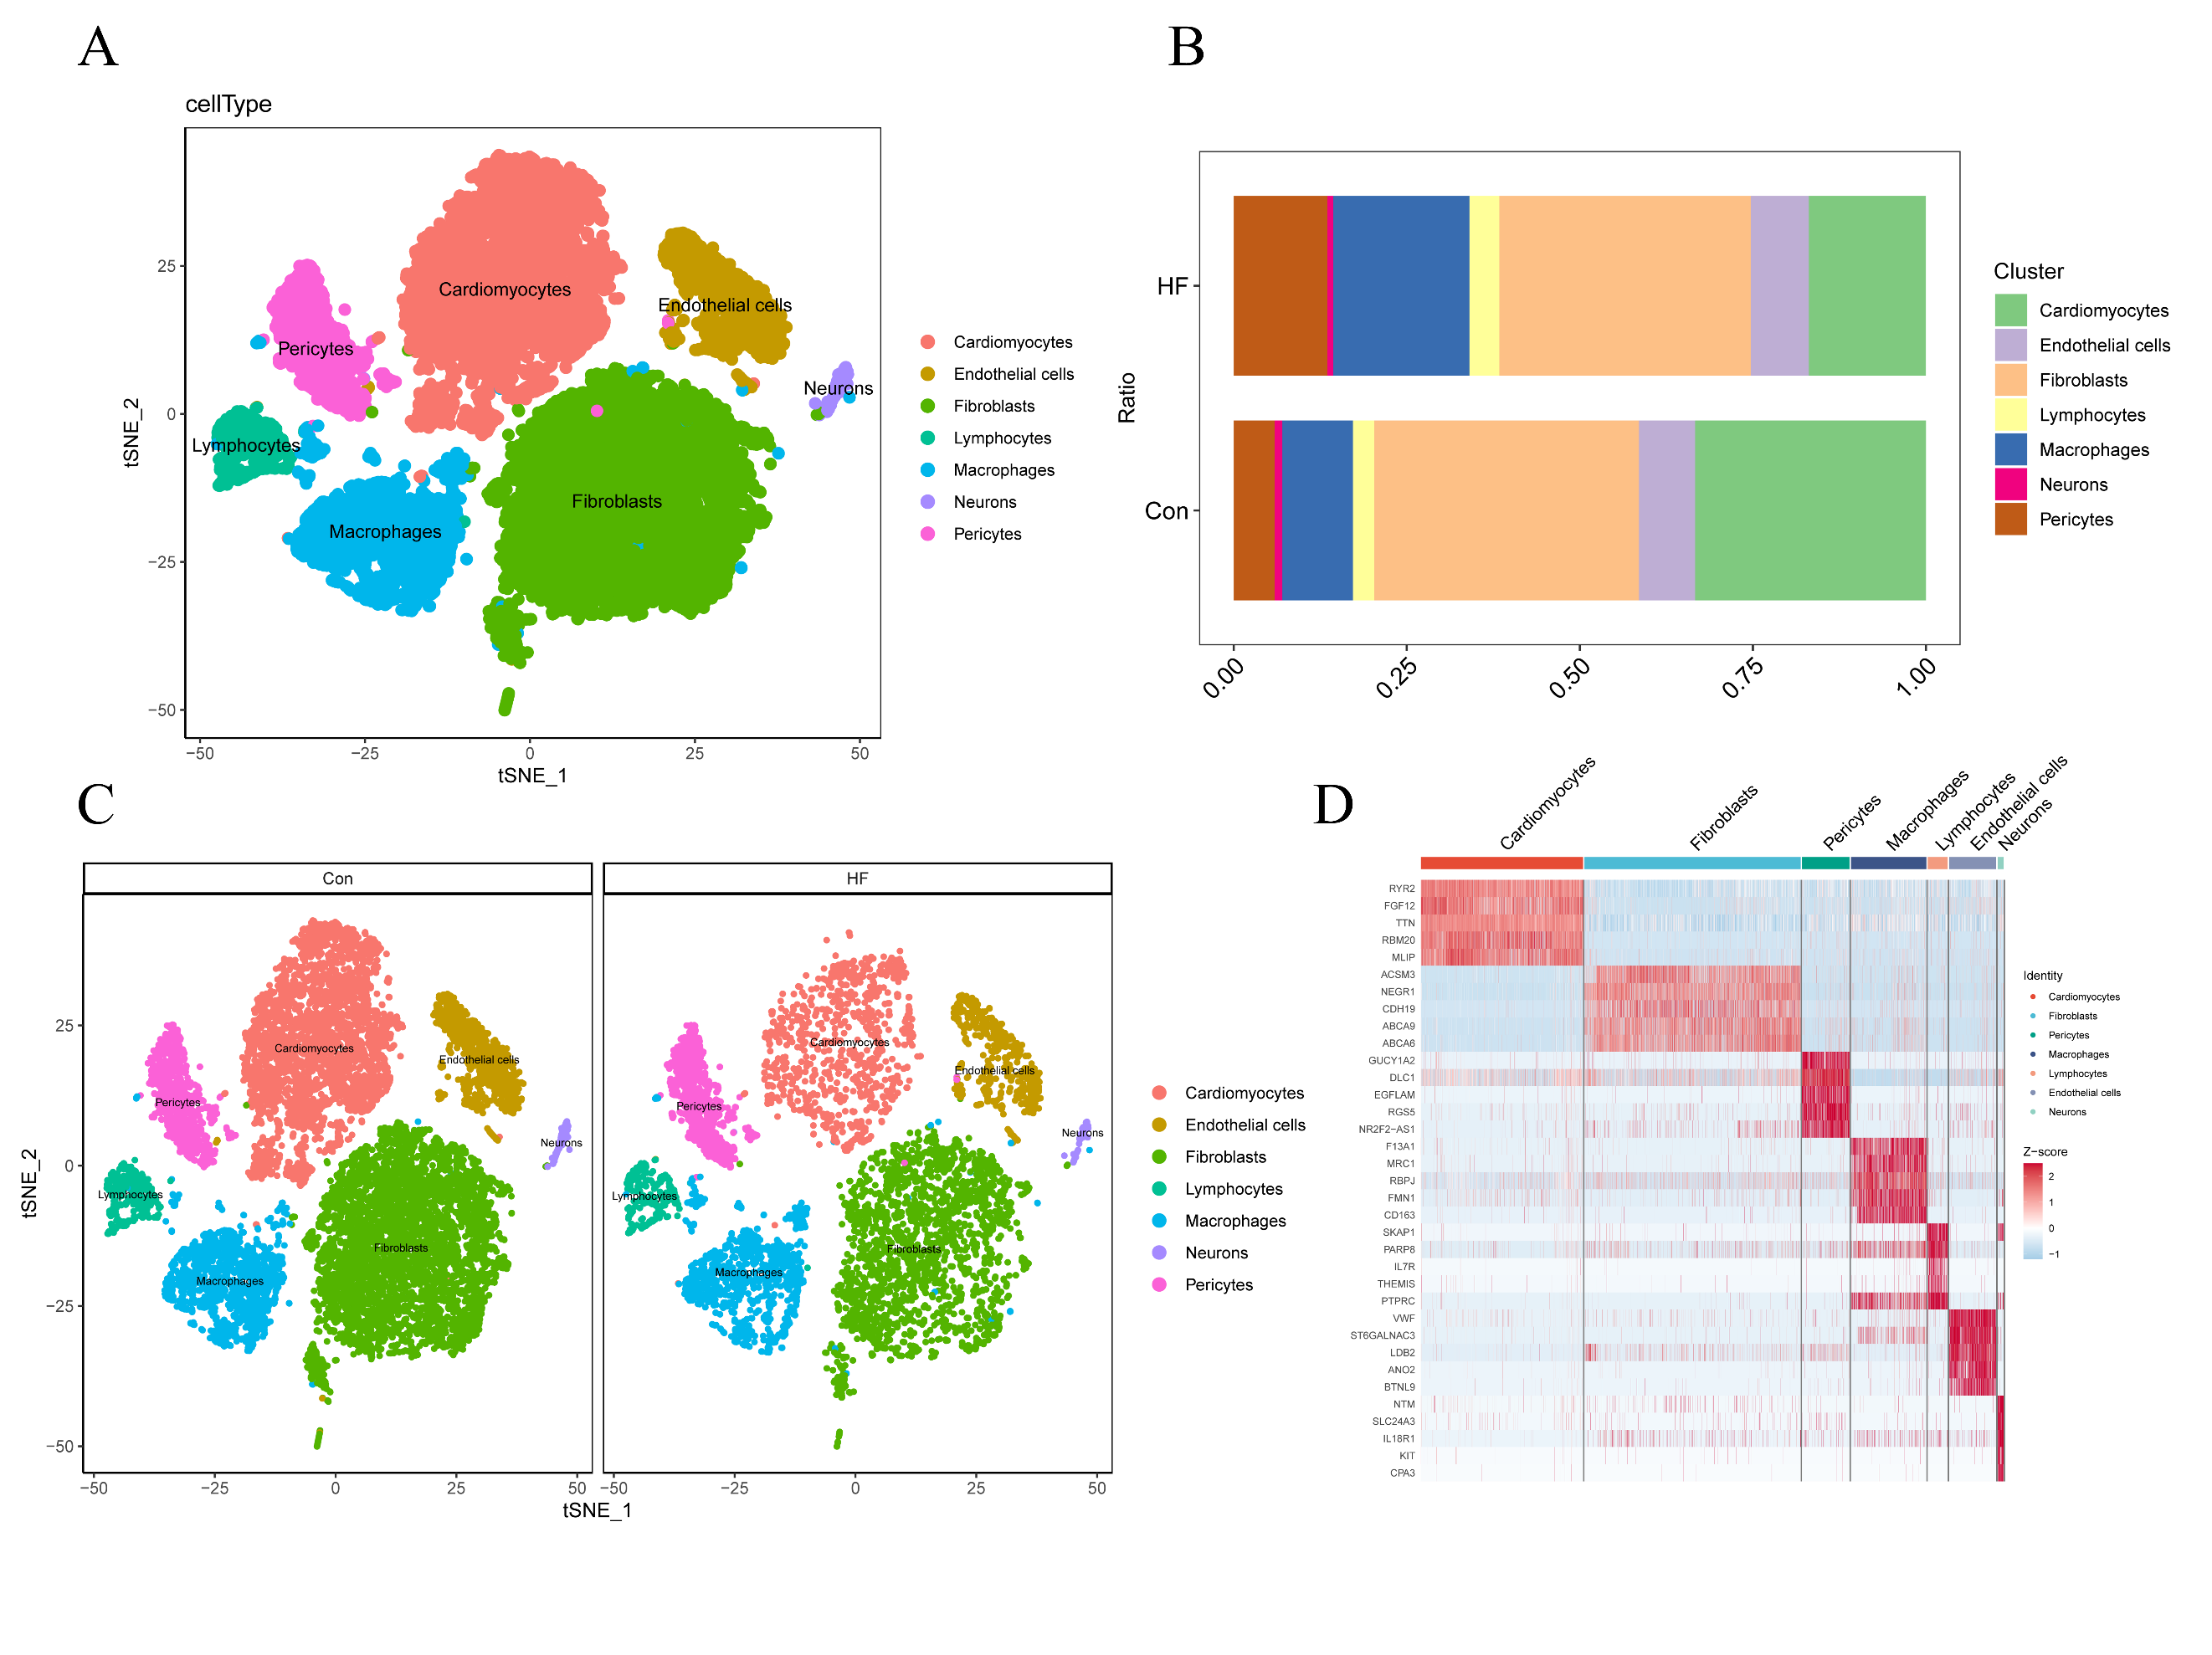


Figure S4 Characteristic genes in single-cell RNA-seq profiling.

(A)Annotated cell population map.

(B) The proportion of each cell’s cluster in Con and HF samples.

(C) tSNE map of annotated cell cluster in Con and HF samples.

(D) Heatmap showing the marker genes for various cell types.


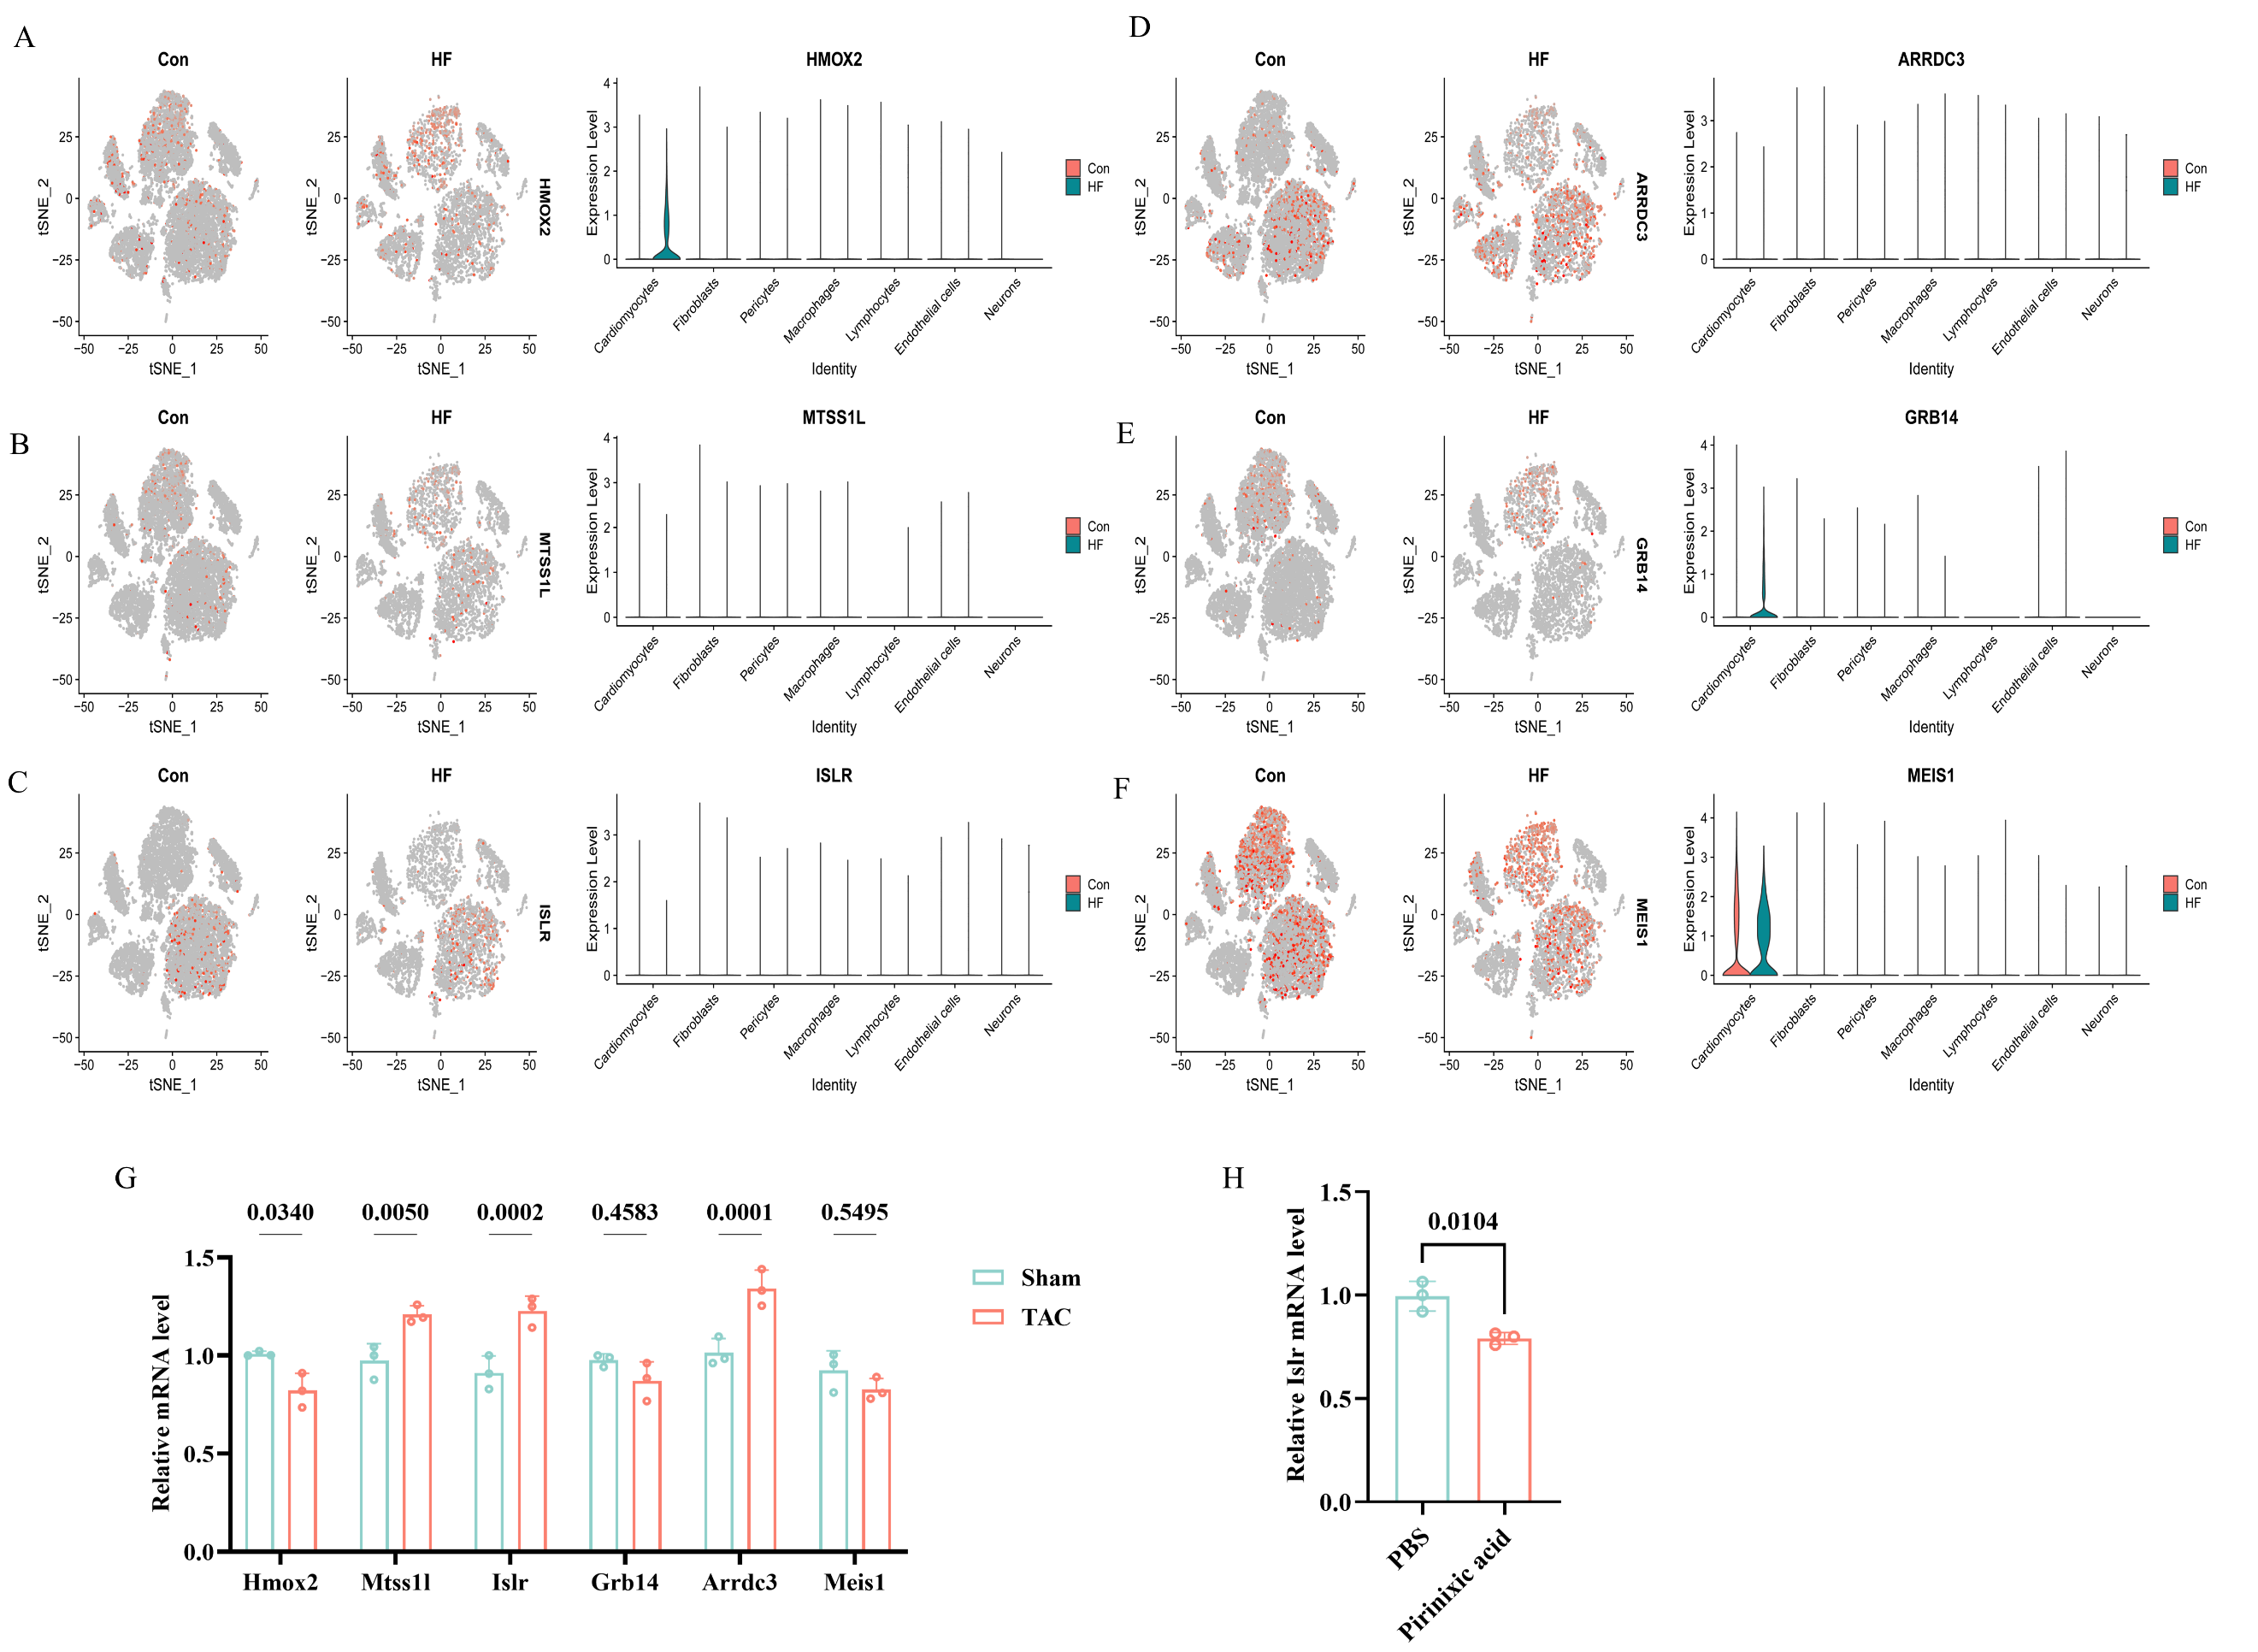


Figure S5 The expression of six characteristic genes at single cell level.

(A) Expression distribution of HMOX2 in single-cell RNA-seq profiling.

(B) Expression distribution of MTSS1L in single-cell RNA-seq profiling.

(C) Expression distribution of ISLR in single-cell RNA-seq profiling.

(D) Expression distribution of ARRDC3 in single-cell RNA-seq profiling.

(E) Expression distribution of GRB14 in single-cell RNA-seq profiling.

(F) Expression distribution of MEIS1 in single-cell RNA-seq profiling.

(G) The mRNA expression of six hub genes after TAC treatment.

(H) The mRNA expression of Islr after Pirinixic acid treatment.

Table S1 The small molecular drugs binding to ISLR in HF.

| Chemical Name | Chemical ID | Interaction | Interaction Actions |
| --- | --- | --- | --- |
| Ethinyl Estradiol | D004997 | [Tetrachlorodibenzodioxin co-treated with Ethinyl Estradiol] results in decreased expression of ISLR mRNA | affects^cotreatment|decreases^expression |
| Tetrachlorodibenzodioxin | D013749 | [Tetrachlorodibenzodioxin co-treated with Ethinyl Estradiol] results in decreased expression of ISLR mRNA | affects^cotreatment|decreases^expression |
| Tretinoin | D014212 | [bis(4-hydroxyphenyl)sulfone co-treated with Tretinoin] results in decreased expression of ISLR mRNA | affects^cotreatment|decreases^expression |
| Dexamethasone | D003907 | [INS protein co-treated with Dexamethasone co-treated with 1-Methyl-3-isobutylxanthine co-treated with Indomethacin co-treated with bisphenol A] results in increased expression of ISLR mRNA | affects^cotreatment|increases^expression |
| Dexamethasone | D003907 | [INS protein co-treated with Dexamethasone co-treated with 1-Methyl-3-isobutylxanthine co-treated with Indomethacin co-treated with bisphenol F] results in increased expression of ISLR mRNA | affects^cotreatment|increases^expression |
| Indomethacin | D007213 | [INS protein co-treated with Dexamethasone co-treated with 1-Methyl-3-isobutylxanthine co-treated with Indomethacin co-treated with bisphenol A] results in increased expression of ISLR mRNA | affects^cotreatment|increases^expression |
| Indomethacin | D007213 | [INS protein co-treated with Dexamethasone co-treated with 1-Methyl-3-isobutylxanthine co-treated with Indomethacin co-treated with bisphenol F] results in increased expression of ISLR mRNA | affects^cotreatment|increases^expression |
| Ethinyl Estradiol | D004997 | Ethinyl Estradiol affects the expression of ISLR mRNA | affects^expression |
| Phenobarbital | D010634 | Phenobarbital affects the expression of ISLR mRNA | affects^expression |
| Tamoxifen | D013629 | Tamoxifen affects the expression of ISLR mRNA | affects^expression |
| Tetrachlorodibenzodioxin | D013749 | Tetrachlorodibenzodioxin affects the expression of ISLR mRNA | affects^expression |
| Air Pollutants | D000393 | [Air Pollutants results in increased abundance of Particulate Matter] which affects the methylation of and affects the expression of ISLR mRNA | affects^expression|affects^methylation|increases^abundance |
| Particulate Matter | D052638 | [Air Pollutants results in increased abundance of Particulate Matter] which affects the methylation of and affects the expression of ISLR mRNA | affects^expression|affects^methylation|increases^abundance |
| Dexamethasone | D003907 | Dexamethasone results in decreased expression of ISLR mRNA | decreases^expression |
| Doxorubicin | D004317 | Doxorubicin results in decreased expression of ISLR mRNA | decreases^expression |
| Gentamicins | D005839 | Gentamicins results in decreased expression of ISLR mRNA | decreases^expression |
| Methotrexate | D008727 | Methotrexate results in decreased expression of ISLR mRNA | decreases^expression |
| pirinixic acid | C006253 | pirinixic acid results in decreased expression of ISLR mRNA | decreases^expression |
| Tetrachlorodibenzodioxin | D013749 | Tetrachlorodibenzodioxin results in decreased expression of ISLR mRNA | decreases^expression |
| Ethinyl Estradiol | D004997 | Ethinyl Estradiol results in increased expression of ISLR mRNA | increases^expression |
| Methamphetamine | D008694 | Methamphetamine results in increased expression of ISLR mRNA | increases^expression |
| Particulate Matter | D052638 | Particulate Matter results in increased expression of ISLR mRNA | increases^expression |
| Tetrachlorodibenzodioxin | D013749 | Tetrachlorodibenzodioxin results in increased expression of ISLR mRNA | increases^expression |
| Vitamin E | D014810 | Vitamin E results in increased expression of ISLR mRNA | increases^expression |

Table S2. Molecular Docking Results of Candidate Compounds Targeting ISLR

| **Compound** | **Target** | **Binding Affinity (ΔG, kcal/mol)** | **vs. HSA Control (ΔΔG, kcal/mol)** | **Statistical Significance (vs. HSA)** | **Specificity Rank** |
| --- | --- | --- | --- | --- | --- |
| Pirinixic acid | ISLR | -8.2 ± 0.3 | -4.1 | P < 0.001 | 1 |
| Dexamethasone | ISLR | -6.5 ± 0.5 | -2.4 | P = 0.02 | 3 |
| Doxorubicin | ISLR | -7.1 ± 0.4 | -3.0 | P = 0.004 | 2 |
| Tetrachlorodibenzodioxin | ISLR | -5.9 ± 0.6 | -1.8 | P = 0.25 | 4 |
| **HSA (Control)** | ISLR | -4.1 ± 0.2 | — | — | — |
